# Supplementary material for: Absolute Quantification of the Host-To-Parasite DNA Ratio in Theileria parva-Infected Lymphocyte Cell Lines
Source: PLOS journal article supplement (doi:10.1371/journal.pone.0150401), 2016-03-01

**A**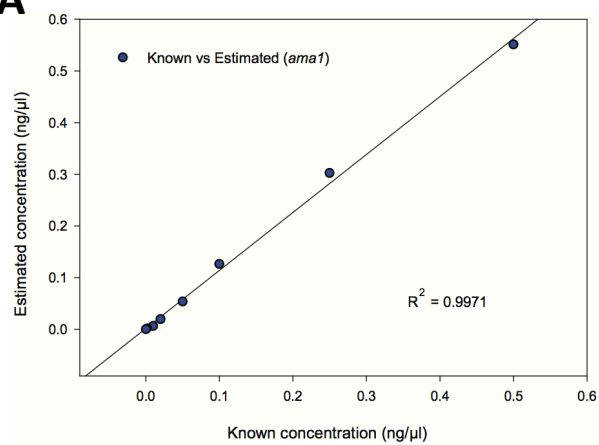**B**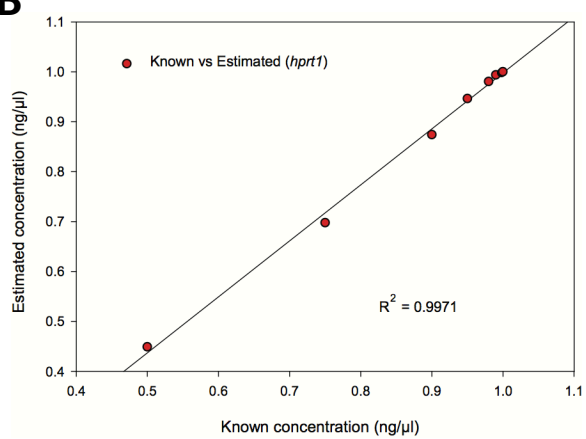

Supplement: S2 (10.1371/journal.pone.0150401.s002) [file journal.pone.0150401.s002]
